# Supplementary material
Source: publisher figshare collection journal article supplement (https://aacr.figshare.com/articles/dataset/_/23627572)

# A Figure S5

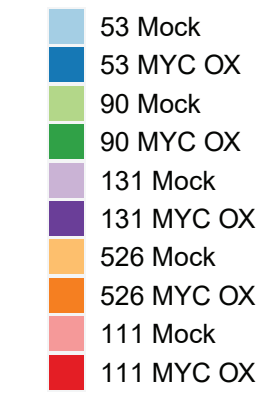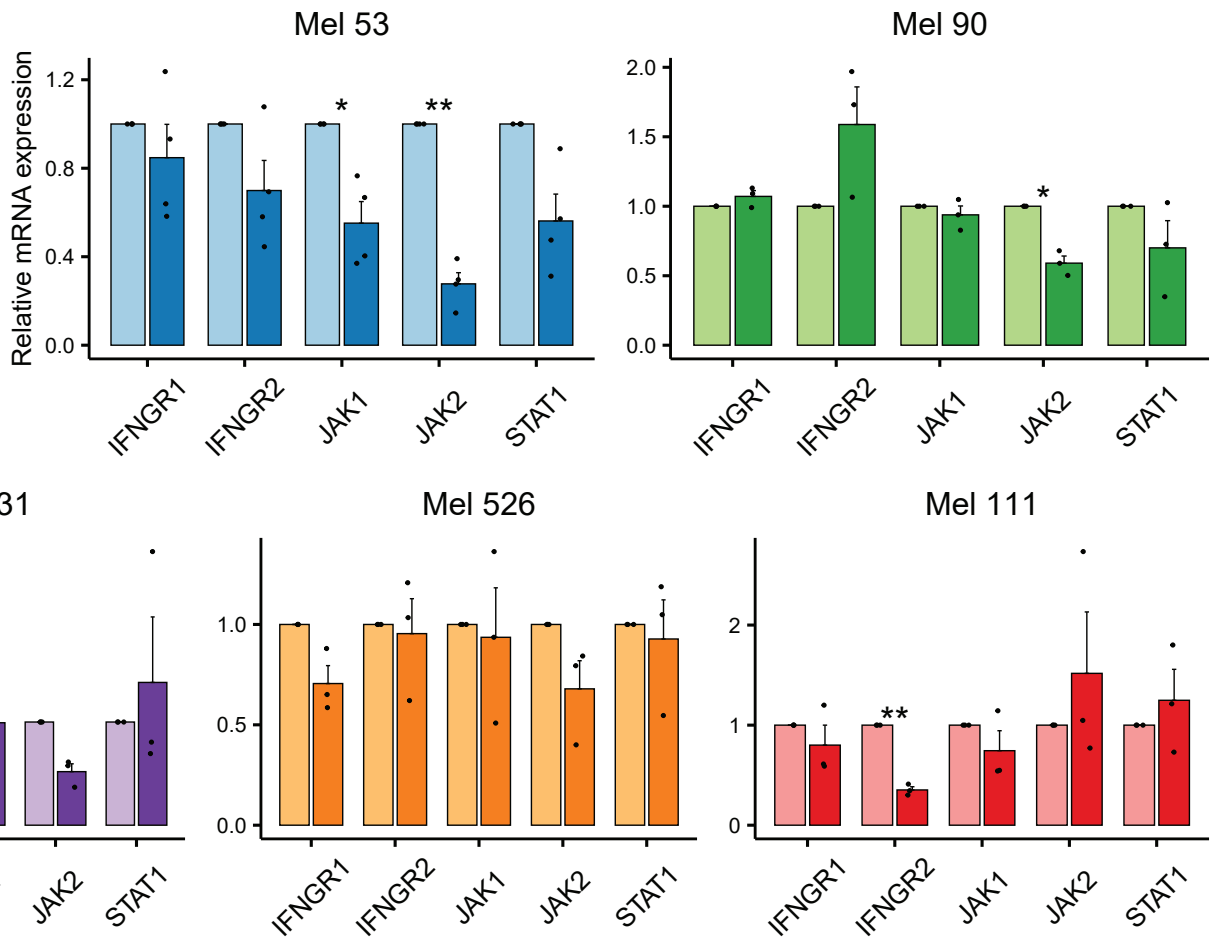

## B

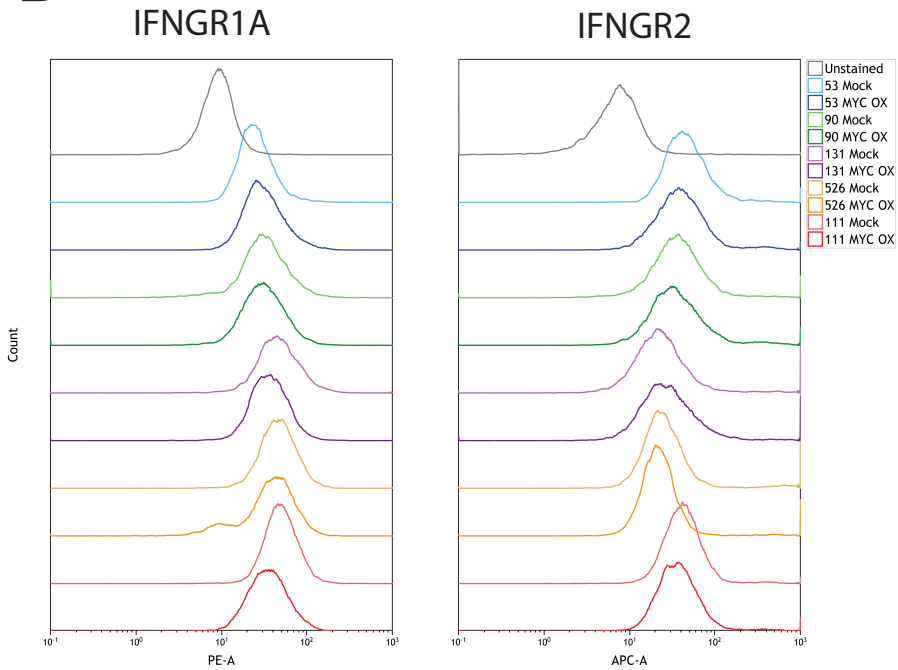

## C

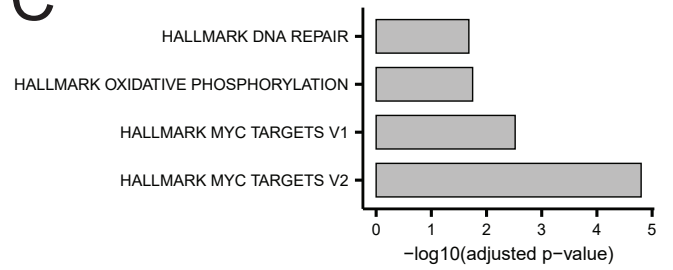

Supplement: Supplementary file 1 [file 41458390]
